# Supplementary material for: Vertical and temporal variations of soil bacterial and archaeal communities in wheat-soybean rotation agroecosystem
Source: PeerJ. 2022 Feb 10;10:e12868. doi: 10.7717/peerj.12868 (PMC8841036; doi:10.7717/peerj.12868)
Supplement: Table S1 [file peerj-10-12868-s001.xlsx]

## Sheet: Sheet2
Table S1. Soil physiochemical variables among soil layers in October, December, April and August.
	October			December			April			August
	Surface	middle	Deep	Surface	middle	Deep	Surface	middle	Deep	Surface	middle	Deep
SM (%)	17.35±1 a	17.63±0.75 a	16.91±2.11 a	15.22±0.64 a	16.65±0.77 a	16.08±2.91 a	17.06±1.54 a	15.44±2.17 a	16.84±1.57 a	18.67±0.96 a	17.09±1.61 ab	14.39±3.64 b
pH	7.68±0.74 a	7.83±0.54	7.91±0.43 a	7.93±0.76 a	8.17±0.32 a	8.18±0.25 a	7.95±0.67 a	8.13±0.52 a	8.19±0.23 a	7.25±0.59 a	7.57±0.55 a	7.44±0.62 a
TN (g/kg)	0.16±0.03 a	0.11±0.05 a	0.04±0.03 b	0.12±0.06 a	0.08±0.01 ab	0.03±0.02 b	0.12±0.06 a	0.09±0.02 ab	0.03±0.01 b	0.13±0.03 a	0.09±0.04 a	0.04±0.02 b
TC (g/kg)	2.62±0.19 a	2.68±0.96 a	1.51±0.38 b	2.24±1.14 a	1.7±0.39 a	1.32±0.27 a	2.19±0.78 a	2.21±0.69 a	1.36±0.41 a	2.54±0.62 a	2.31±0.74 a	1.29±0.45 b
NH4 (mg/kg)	4.23±0.34 a	4.35±0.35 a	4.05±0.31 a	4.83±1.16	4.33±0.34	4.18±0.6 a	3.93±0.57 a	4.45±0.36	4.33±0.21	4.2±4.18 a	2.27±0.48 a	2.2±0.27 a
NO3 (mg/kg)	66.07±44.5 a	36.27±33.39 a	20.88±7.99 a	92.27±37.28 a	62.12±48.28 a	50.35±38.5 a	62.72±47.26 a	29.67±27.39	15.72±6.92	18.33±10.93 a	24.22±13.51 a	19.25±13.27 a
DOC (mg/kg)	0.73±0.05 a	0.69±0.07 a	0.72±0.05 a	0.72±0.09 a	0.67±0.1 a	0.6±0.11 a	0.64±0.05 a	0.63±0.07	0.63±0.08	0.62±0.08 a	0.63±0.06 a	0.63±0.04 a
DON (mg/kg)	0.08±0.07 a	0.03±0.03 a	0.02±0.01 a	0.1±0.14 a	0.18±0.24 a	0.06±0.05 a	0.06±0.06 a	0.03±0.03	0.02±0.01	0.02±0.01 a	0.02±0.01 a	0.02±0.01 a
Sand (%)	4.39±0.34 b	4.85±0.42 b	5.72±0.69 a	4.49±0.91 a	5.54±1.03 a	5.98±0.69 a	4.52±0.29 b	5±0.9 b	6.78±0.58 a	5.13±0.33 a	6.23±0.81a	6.51±1.4 a
Silt (%)	55.22±3.12 a	56.56±2.81 a	58.67±2.86 a	54.54±9.59 a	60.46±4.47 a	61.69±3.49 a	56.31±3.78 a	55.13±6.66 a	60.47±3.69 a	60.06±1.79 b	63.1±2.17 ab	65.52±5.29 a
Clay (%)	40.39±3.39 a	38.58±3.07 a	35.61±3.49 a	40.96±10.49 a	34±5.47 a	32.33±4.07 a	39.19±3.96 a	39.86±7.5 a	32.76±4 a	34.81±2.11 a	30.67±2.94 ab	27.96±6.5 a
arc_S	13.83±8.28 a	11.17±4.07 a	10.83±4.36 a	10.83±3.19 a	17.67±3.5 a	14±4.43 a	9.17±1.72 a	11.83±5.38 a	13.5±6.28 a	9.67±2.66 a	10.83±2.4 a	11.67±8.09 a
arc_J	0.48±0.11 a	0.44±0.06 a	0.16±0.12 b	0.53±0.07 a	0.4±0.08 b	0.14±0.09 c	0.55±0.06 a	0.41±0.1 b	0.16±0.1 c	0.54±0.08 a	0.39±0.03 b	0.14±0.08 c
bac_S	12489.83±1778.5 b	15524±2282.22 a	12827.5±1228.29 ab	14220.5±1562.85 a	12573.83±1402.65 ab	11477.83±2095.83 a	12785.67±1444.14 ab	14783.5±1779.22 a	10864.17±1715.74 b	14087.67±693.06 a	15049.33±2309.49 a	12457.83±2746.2 a
bac_J	0.73±0.02 a	0.73±0.02 a	0.72±0.02 a	0.72±0.01a	0.71±0.02 ab	0.68±0.03 a	0.72±0.02 a	0.74±0.01a	0.7±0.01 b	0.74±0.01 a	0.74±0.03 a	0.71±0.02 a
Abbreviations: SM, soil moisture; TN, total nitrogen; TC, total carbon; NH4, ammonia nitrogen; NO3, nitrate nitrogen; DOC, dissoved organic carbon; DON, dissoved organic nitrogen; arc_S, richness of archaea; arc_J, evenness of archaea; bac_S, richness of bacteria; arc_J, evenness of bacteria.
Shared letters denote no significant difference among soil layers in October, December, April and August, as indicated by Tukey’s HSD test at p < 0.05.
