# Supplementary material for: Vertical and temporal variations of soil bacterial and archaeal communities in wheat-soybean rotation agroecosystem
Source: PeerJ. 2022 Feb 10;10:e12868. doi: 10.7717/peerj.12868 (PMC8841036; doi:10.7717/peerj.12868)
Supplement: Table S2 [file peerj-10-12868-s002.xlsx]

## Sheet: Table S1
Table S2. Pearson correlations between soil variables and main soil prokaryotic phyla.
	depth	Soil moisture	Ph	TN	TC	NH4	NO3	DOC	DON	clay	silt	sand
Actinobacteriota	.298*	0.00818678	0.221449	-.297*	-.398**	0.177702	0.175422	-0.0693342	.236*	.268*	0.158951	-0.181309
Proteobacteria	-.592**	.266*	-.265*	.478**	.296*	.282*	.274*	.240*	-0.00683802	-.386**	-0.192757	0.230281
Firmicutes	-.263*	0.0918086	0.136793	0.206202	0.0392272	.319**	.423**	0.192825	.474**	-0.220603	-0.130936	0.14989
Chloroflexi	-0.219258	-0.057451	0.160102	0.0643798	0.05293	0.0688517	0.167808	-0.0759698	.338**	-0.0878299	-0.0740253	0.0785108
Acidobacteriota	-.334**	0.0526199	-0.0927076	.280*	.405**	-.285*	-0.176793	-0.0742965	-.291*	-0.229134	-0.138364	0.157069
Crenarchaeota	.440**	-0.193256	0.00115224	-.282*	-0.14822	-0.23117	-0.211922	-0.227585	-0.14572	0.170383	0.0809168	-0.098233
Planctomycetota	-.357**	0.0411313	-0.080917	.312**	.394**	-.247*	-0.0834875	-0.0351489	-0.21019	-.281*	-0.198433	0.217406
Methylomirabilota	.554**	-0.218616	-0.0872233	-.365**	-0.225964	-.263*	-.444**	-0.040264	-.333**	.325**	0.214657	-.239*
Gemmatimonadota	0.221401	0.145462	-0.109114	-0.0436388	-0.03922	0.00380834	-0.218747	0.20453	-.296*	0.112506	0.00892204	-0.026747
Myxococcota	-.503**	0.194415	-.248*	.411**	.305**	0.229771	0.153353	0.155258	-0.125627	-.384**	-0.216603	.250*
Abbreviations: TN, total nitrogen; TC, total carbon; NH4, ammonium; NO3, nitrate; DOC, dissolved organic carbon; DON, dissolved organic nitrogen.
