# Supplementary material for: Vertical and temporal variations of soil bacterial and archaeal communities in wheat-soybean rotation agroecosystem
Source: PeerJ. 2022 Feb 10;10:e12868. doi: 10.7717/peerj.12868 (PMC8841036; doi:10.7717/peerj.12868)
Supplement: Table S3 [file peerj-10-12868-s003.xlsx]

## Sheet: Sheet1
Table S3 Two-way ANOVA examining the effects of soil depth and sampling time on predicted ecological function of prokaryotic communities.
	Sampling time (T)			Soil depth (D)			D × T
	F	P		F	P		F	P
methanogenesis_by_CO2_reduction_with_H2	3.30012	0.0262832		12.0603	3.95783e-05		2.86162	0.0161504
hydrogenotrophic_methanogenesis	3.85959	0.0136286		12.6829	2.54688e-05		3.19368	0.0086966
methanogenesis	4.45196	0.0068649		13.7991	1.17406e-05		3.33527	0.00668385
methanol_oxidation	8.68607	7.12944e-05		6.75931	0.00225224		3.59118	0.00416102
methylotrophy	8.12049	0.000126829		6.10439	0.00386222		2.03137	0.0752613
aerobic_ammonia_oxidation	0.304019	0.822368		7.90494	0.000896942		1.11013	0.367239
aerobic_nitrite_oxidation	1.14243	0.339321		1.62967	0.20455		1.42959	0.218392
nitrification	0.303824	0.822508		7.90145	0.000899422		1.10975	0.367456
sulfate_respiration	2.24821	0.0918896		14.7748	6.06203e-06		1.5321	0.183271
sulfite_respiration	5.82881	0.00145619		17.5006	1.0296e-06		1.77922	0.118692
thiosulfate_respiration	5.82881	0.00145619		17.5006	1.0296e-06		1.77922	0.118692
respiration_of_sulfur_compounds	2.24821	0.0918896		14.7748	6.06203e-06		1.5321	0.183271
anammox	0.415694	0.742353		5.4729	0.00655746		0.390694	0.882175
dark_hydrogen_oxidation	8.02142	0.00014044		6.81199	0.00215754		4.21914	0.00131833
nitrogen_fixation	3.85197	0.0137503		9.25643	0.000313555		3.0421	0.0115339
nitrite_respiration	7.79463	0.000177568		13.1339	1.85806e-05		4.87272	0.000409051
cellulolysis	1.84191	0.149211		12.997	2.04409e-05		5.14321	0.000254232
xylanolysis	1.42319	0.244855		4.09145	0.021591		2.90347	0.0149372
dark_oxidation_of_sulfur_compounds	1.66548	0.183995		29.6071	1.13421e-09		0.471102	0.827085
manganese_oxidation	1.12893	0.344622		57.6233	1.08406e-14		1.12963	0.356281
fermentation	1.96294	0.129176		60.8973	3.6067e-15		1.71991	0.131906
aerobic_chemoheterotrophy	2.99614	0.0376712		91.5371	5.92067e-19		2.11788	0.064243
human_pathogens_pneumonia	3.6214	0.0180073		21.0054	1.21659e-07		0.882852	0.513122
human_pathogens_all	6.54084	0.000669493		5.39319	0.00701532		3.17715	0.00896831
human_gut	1.39731	0.252398		0.0505051	0.95079		0.589226	0.737594
mammal_gut	1.39731	0.252398		0.0505051	0.95079		0.589226	0.737594
animal_parasites_or_symbionts	3.10401	0.0331465		8.16008	0.000733433		0.987065	0.442181
aromatic_hydrocarbon_degradation	1.79724	0.157353		1.57776	0.214882		1.6712	0.143771
aromatic_compound_degradation	0.234341	0.872095		58.5911	7.79707e-15		0.853308	0.53436
aliphatic_non_methane_hydrocarbon_degradation	1.79724	0.157353		1.57776	0.214882		1.6712	0.143771
hydrocarbon_degradation	1.08576	0.362082		1.55951	0.21864		1.71827	0.132289
dark_iron_oxidation	3.21631	0.0290196		1.50345	0.230619		0.829933	0.551479
iron_respiration	1.08217	0.363571		12.2885	3.36492e-05		2.03205	0.0751677
nitrate_respiration	7.78603	0.00017916		11.6216	5.42081e-05		3.71618	0.0033045
nitrate_reduction	5.41811	0.00229739		13.0473	1.97366e-05		1.53294	0.183007
nitrogen_respiration	7.5163	0.000237342		10.771	0.000100713		3.77542	0.00296335
fumarate_respiration	2.72177	0.0522102		17.8242	8.39857e-07		2.08698	0.0679871
intracellular_parasites	1.15551	0.334254		6.71027	0.00234429		0.927962	0.481621
predatory_or_exoparasitic	8.19382	0.000117635		15.5001	3.74331e-06		1.08333	0.382713
chloroplasts	6.09803	0.0010833		13.7447	1.21861e-05		2.31916	0.0443298
cyanobacteria	1.68956	0.178817		7.48692	0.00125096		0.336714	0.914821
oxygenic_photoautotrophy	1.68956	0.178817		7.48692	0.00125096		0.336714	0.914821
photoautotrophy	1.72612	0.171227		7.94744	0.000867291		0.343602	0.910889
photoheterotrophy	1.4846	0.227814		9.30259	0.000302692		1.22327	0.307167
phototrophy	1.75002	0.166437		8.0378	0.000807561		0.352979	0.905421
ureolysis	0.472115	0.702853		23.307	3.23683e-08		0.944504	0.470367
reductive_acetogenesis	2.61053	0.0596153		4.64978	0.0132625		0.635867	0.701
chemoheterotrophy	3.10671	0.0330407		91.2996	6.27844e-19		2.17568	0.057771
