# Supplementary material for: Vertical and temporal variations of soil bacterial and archaeal communities in wheat-soybean rotation agroecosystem
Source: PeerJ. 2022 Feb 10;10:e12868. doi: 10.7717/peerj.12868 (PMC8841036; doi:10.7717/peerj.12868)
Supplement: Table S4 — Major topological properties of the soil prokaryotic networks in surface, middle and deep soil layers. [file peerj-10-12868-s004.xlsx]

## Sheet: Table S2
Table S4. Co-occurrence network topological parameters. Major topological properties of the soil prokaryotic networks in surface, middle and deep soil layers.
	Edges	Vertices	Connectance	Average degree	Average path length	Clustering coefficient	Modularity	Positive links	Negative links
Surface	684	217	0.029	6.3	5.32	0.69	0.65	675	9
Middle	807	247	0.027	6.53	5.15	0.44	0.63	681	126
Deep	719	274	0.019	5.25	5.39	0.45	0.74	580	139
