# Supplementary material for: Vertical and temporal variations of soil bacterial and archaeal communities in wheat-soybean rotation agroecosystem
Source: PeerJ. 2022 Feb 10;10:e12868. doi: 10.7717/peerj.12868 (PMC8841036; doi:10.7717/peerj.12868)
Supplement: Table S5 [file peerj-10-12868-s005.xlsx]

## Sheet: Table S3
Table S5 The classification at each taxonomic level of the keystone species.
Soil layers	Keystone species	Classification
Surface	ASV188	d__Bacteria;k__norank_d__Bacteria;p__Proteobacteria;c__Alphaproteobacteria;o__Tistrellales;f__Geminicoccaceae;g__norank_f__Geminicoccaceae
Middle	ASV134	d__Bacteria;k__norank_d__Bacteria;p__Acidobacteriota;c__Vicinamibacteria;o__Subgroup_9;f__norank_o__Subgroup_9;g__norank_f__norank_o__Subgroup_9
Middle	ASV100	d__Bacteria;k__norank_d__Bacteria;p__Actinobacteriota;c__Thermoleophilia;o__Gaiellales;f__norank_o__Gaiellales;g__norank_f__norank_o__Gaiellales
Middle	ASV363	d__Bacteria;k__norank_d__Bacteria;p__Actinobacteriota;c__Actinobacteria;o__Micromonosporales;f__Micromonosporaceae;g__Micromonospora
Deep	ASV67	d__Bacteria;k__norank_d__Bacteria;p__Acidobacteriota;c__Blastocatellia;o__Pyrinomonadales;f__Pyrinomonadaceae;g__RB41
Deep	ASV58	d__Bacteria;k__norank_d__Bacteria;p__Actinobacteriota;c__Thermoleophilia;o__Gaiellales;f__norank_o__Gaiellales;g__norank_f__norank_o__Gaiellales
Deep	ASV281	d__Bacteria;k__norank_d__Bacteria;p__Methylomirabilota;c__Methylomirabilia;o__Methylomirabilales;f__Methylomirabilaceae;g__wb1-A12
Deep	ASV99	d__Bacteria;k__norank_d__Bacteria;p__Acidobacteriota;c__Vicinamibacteria;o__Subgroup_17;f__norank_o__Subgroup_17;g__norank_f__norank_o__Subgroup_17
Deep	ASV6	d__Bacteria;k__norank_d__Bacteria
Deep	ASV134	d__Bacteria;k__norank_d__Bacteria;p__Acidobacteriota;c__Vicinamibacteria;o__Subgroup_9;f__norank_o__Subgroup_9;g__norank_f__norank_o__Subgroup_9
