# Supplementary material for: Vertical and temporal variations of soil bacterial and archaeal communities in wheat-soybean rotation agroecosystem
Source: PeerJ. 2022 Feb 10;10:e12868. doi: 10.7717/peerj.12868 (PMC8841036; doi:10.7717/peerj.12868)
Supplement: Table S6 [file peerj-10-12868-s006.xlsx]

## Sheet: Sheet1
Table S6 Two-way ANOVA examining the effects of soil depth and sampling time on soil moisture (SM), pH, total nitrogen (TN), total carbon (TC), ammonia (NH4+-N), nitrate (NO3--N), dissoved organic carbon, dissoved organic nitrogen, sand, silt and clay content.
	Soil depth (D)			Sampling time (T)			D × T
	F	P		F	P		F	P
SM	1.54375	0.212478		1.85022	0.166061		2.88803	0.0153737
Ph	6.11201	0.00106686		1.35496	0.265737		0.0511036	0.999416
TN	2.14372	0.104106		44.1184	1.64385e-12		0.429058	0.856712
TC	2.07086	0.113569		17.4554	1.05943e-06		0.547657	0.769819
NH4+-N	5.38647	0.00238009		1.40492	0.253341		1.29772	0.272151
NO3--N	7.16994	0.000341761		6.93689	0.00194907		0.897792	0.502561
DOC	5.25357	0.0027622		1.32948	0.272297		1.08202	0.383482
DON	4.03511	0.0111105		1.29144	0.282405		0.91366	0.491482
Sand	4.89331	0.00414786		26.5002	5.65117e-09		1.27913	0.280568
Silt	6.36696	0.000808115		7.15385	0.00163502		0.684024	0.66314
Clay	6.35897	0.00081516		9.65423	0.000231714		0.680126	0.666198
